# Supplementary material for: Catalytic oxygenation of phenols by arthropod hemocyanin, an oxygen carrier protein, from Portunus trituberculatus
Source: Royal Society of Chemistry journal article supplement (doi:10.1039/c000760a), 2010-01-01

## Electronic Supplementary Information

For

Catalytic oxygenation of phenols by arthropod hemocyanin, an oxygen carrier protein,  
from *Portunus trituberculatus*

Nobutaka Fujieda<sup>a</sup>, Aki Yakiyama<sup>b</sup>, and Shinobu Itoh<sup>\*a</sup>

<sup>a</sup> *Department of Material and Life Science, Division of Advanced Science and Biotechnology, Graduate School of Engineering, Osaka University, 2-1 Yamadaoka, Suita, Osaka, 565-0871, Japan*

<sup>b</sup> *Department of Chemistry, Graduate School of Science, Osaka City University, 3-3-138 Sugimoto, Sumiyoshi-ku, Osaka 558-8585, Japan*

**Contents:**

**Fig. S1** (A) The elution diagram of *Pt*-Hc after dialysis with dissociation buffer with ion-exchange column chromatography on RESORCE Q, (B) SDS/10 % polyacrylamide gel electrophoresis (PAGE) and (C) Blue native PAGE of the purified *Pt*-12Hc, *Pt*-6Hc and *Pt*-1Hc.

**Fig. S2** Time courses of the absorbance change at 338 nm for the reactions of the oxy-form of *Pt*-1Hc (13  $\mu$ M) and *p*-cresol (5 mM) (A) in the absence of urea and (B) in the presence of 3 M urea in 0.5 M borate buffer (pH 9.0) containing 10 % (v/v) methanol at 25 °C under anaerobic conditions.

**Fig. S3 ~ S6** (A) Spectral change observed upon addition of *p*-substituted phenols to the oxy-form of *Pt*-1Hc (13  $\mu$ M) in 0.5 M borate buffer (pH 9.0) containing 10 % (v/v) methanol and 3M urea at 25 °C under N<sub>2</sub> (inset: first-order plot based on the absorption change at 338 nm). (B) Plot of  $k_{\text{obs}}$  vs. [Substrate]. (inset: Hanes-Woolf plot)

**Fig. S7 ~ S11** (A) Spectral change of the fast phase observed upon addition of *p*-substituted phenols to the oxy-form of *Pt*-6Hc (39  $\mu$ M) in 0.5 M borate buffer (pH 9.0) containing 3 M urea and 5% (v/v) methanol at 25 °C under N<sub>2</sub> (inset: time course of the concentration change of *Pt*-6Hc). (B) Plot of  $V_{\text{obs}}$  vs. [Substrate] (inset: Hanes-Woolf plot) (right).

**Scheme S1** Simplified catalytic system of monooxygenase (phenolase) reaction

Fig. S1

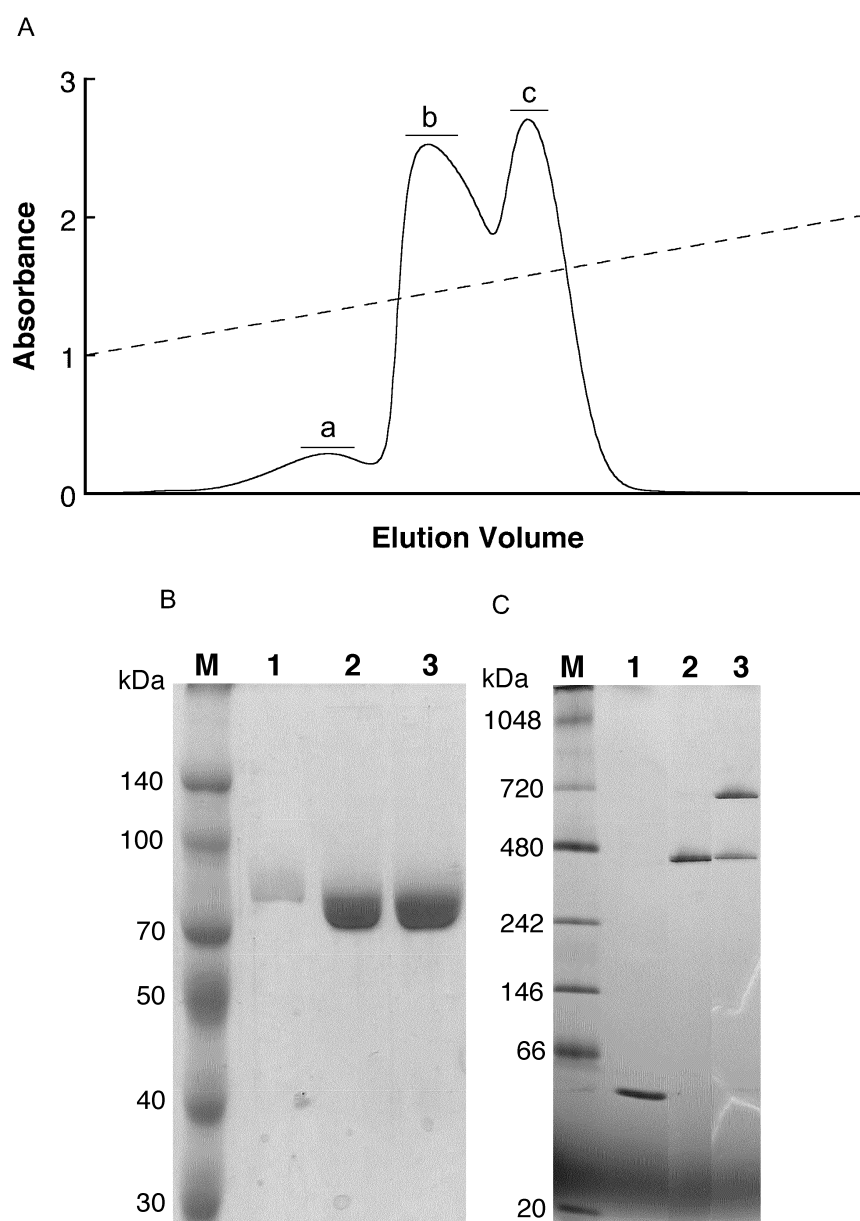

**Fig. S1** (A) The elution diagram of multimeric and monomeric *Pt*-Hc after dialysis with 0.05 M Tris-HCl buffer, pH 8.9 containing 0.01 M EDTA with ion-exchange column chromatography on RESORCE Q (Vol. 6 mL, GE Healthcare) at 4 °C in a 0.05 M Tris-HCl buffer, pH 8.9, with 0.01 M EDTA. Elution was carried out in a 0-0.4 M NaCl gradient using a ÄKTA prime plus. (B) SDS/10 % polyacrylamide gel electrophoresis. M, maker protein; 1, fraction a (*Pt*-1Hc); 2, fraction b (*Pt*-6Hc); 3, fraction c (*Pt*-12Hc). (C) Blue native polyacrylamide gel electrophoresis. M, maker protein; 1, fraction a (*Pt*-1Hc); 2, fraction b (*Pt*-6Hc); 3, fraction c (*Pt*-12Hc).

Fig. S2

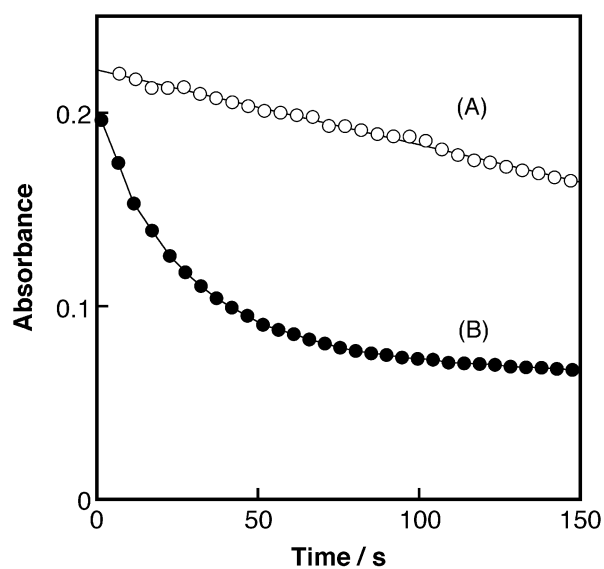

**Fig. S2** Time courses of the absorbance change at 338 nm for the reactions of the oxy-form of monomeric *Pt*-1Hc (14  $\mu$ M) and *p*-methylphenol (5 mM) (A) in the absence of urea and (B) in the presence of 3 M urea in 0.5 M borate buffer (pH 9.0) containing 10 % (v/v) methanol at 25 °C under anaerobic conditions.

Fig. S3

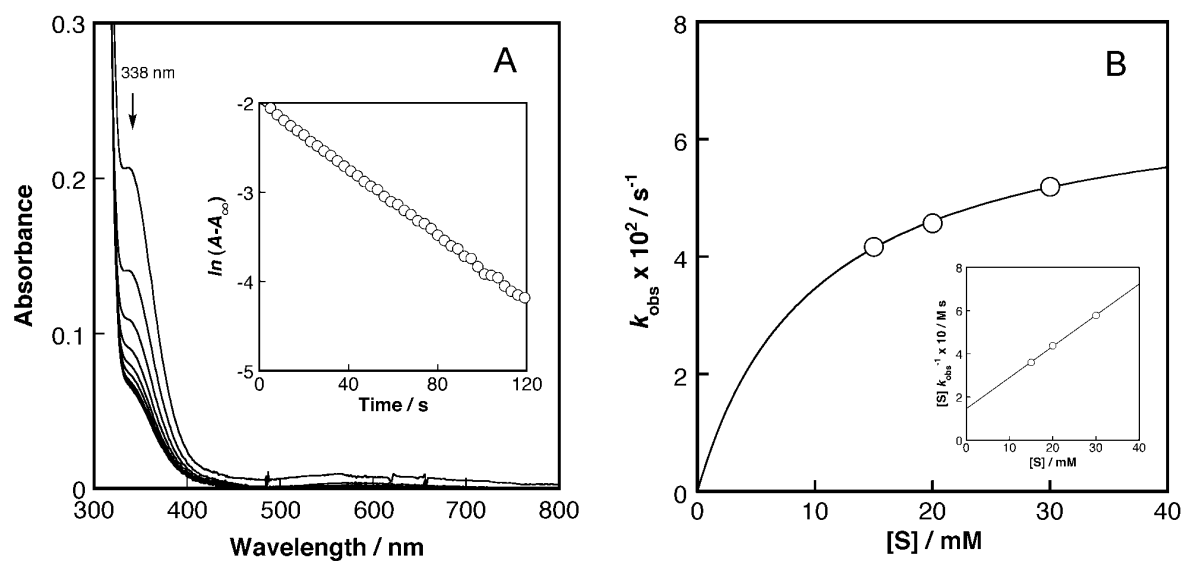

**Fig. S3** (A) Spectral change observed upon addition of *p*-fluorophenol (10 mM) to the oxy-form of monomeric *Pt*-1Hc (13  $\mu$ M) in 0.5 M borate buffer (pH 9.0) containing 10 % (v/v) methanol and 3 M urea at 25  $^{\circ}$ C under  $N_2$ : 15 s interval (Inset: First-order plot based on the absorption change at 338 nm). (B) Plot of  $k_{\text{obs}}$  vs. [Substrate] (Inset: Hanes-Woolf plot).

Fig. S4

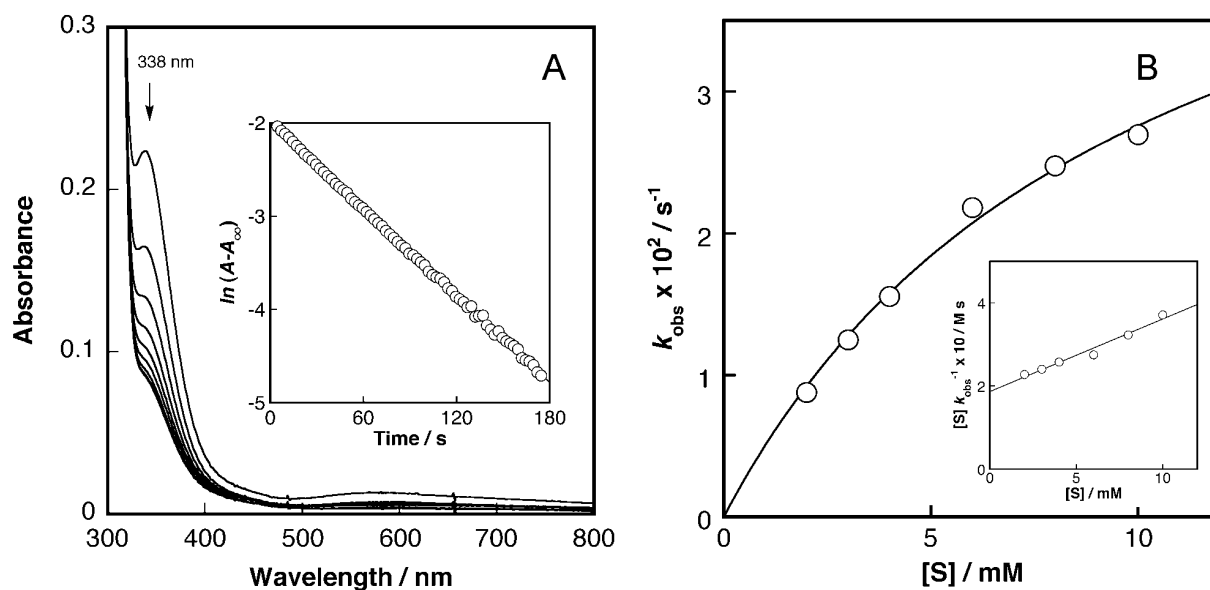

**Fig. S4** (A) Spectral change observed upon addition of *p*-chlorophenol (4 mM) to the oxy-form of monomeric *Pt*-1Hc (13  $\mu$ M) in 0.5 M borate buffer (pH 9.0) containing 10% (v/v) methanol and 3 M urea at 25  $^{\circ}$ C under  $N_2$ : 15 s interval (Inset: First-order plot based on the absorption change at 338 nm). (B) Plot of  $k_{\text{obs}}$  vs. [Substrate] (Inset: Hanes-Woolf plot).

Fig. S5

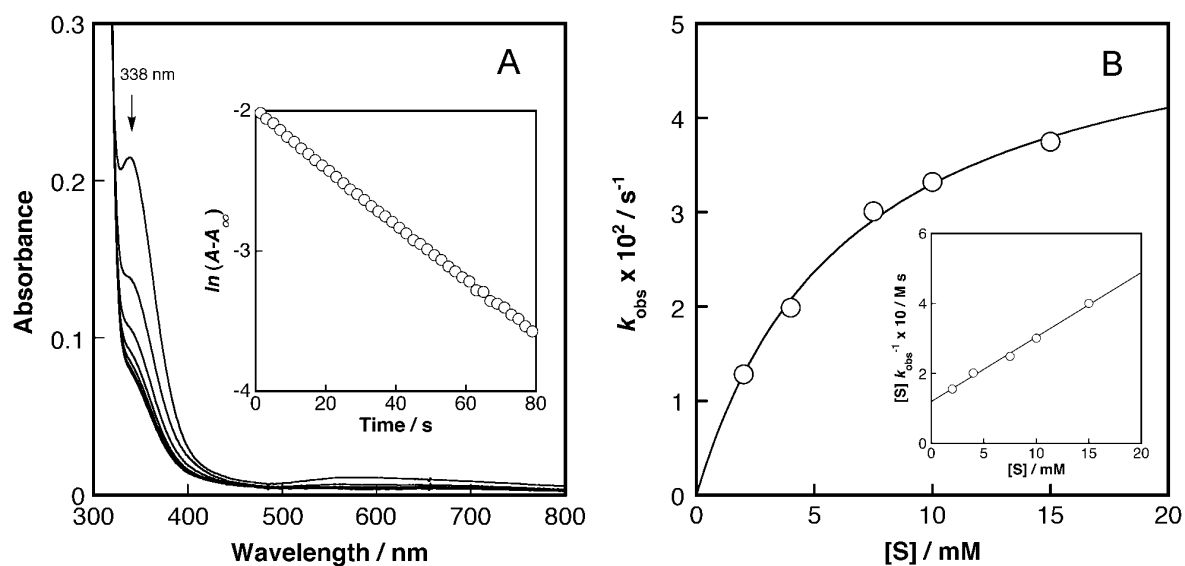

**Fig. S5** (A) Spectral change observed upon addition of *p*-bromophenol (4 mM) to the oxy-form of monomeric *Pt*-1Hc (13 μM) in 0.5 M borate buffer (pH 9.0) containing 10% (v/v) methanol and 3 M urea at 25 °C under N<sub>2</sub>: 40 s interval (Inset: First-order plot based on the absorption change at 338 nm). (B) Plot of  $k_{\text{obs}}$  vs. [Substrate] (Inset: Hanes-Woolf plot).

Fig. S6

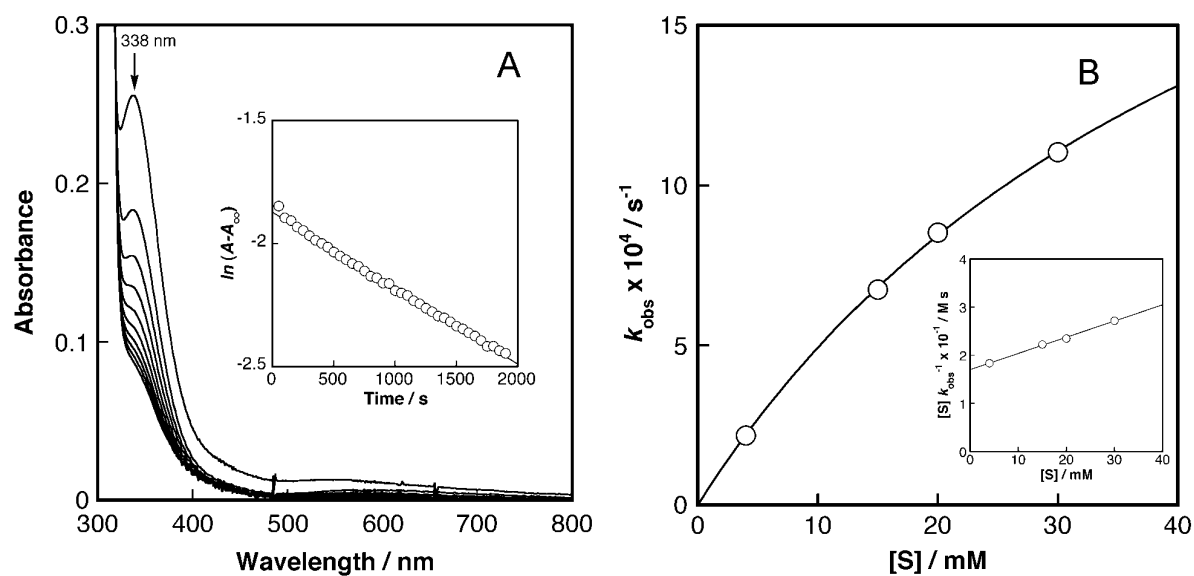

**Fig. S6** (A) Spectral change observed upon addition of *p*-cyanophenol (10 mM) to the oxy-form of monomeric *Pt*-1Hc (13  $\mu\text{M}$ ) in 0.5 M borate buffer (pH 9.0) containing 10 % (v/v) methanol and 3 M urea at 25  $^{\circ}\text{C}$  under  $\text{N}_2$ : 1000 s interval (Inset: First-order plot based on the absorption change at 338 nm). (B) Plot of  $k_{\text{obs}}$  vs. [Substrate] (Inset: Hanes-Woolf plot).



Fig. S7

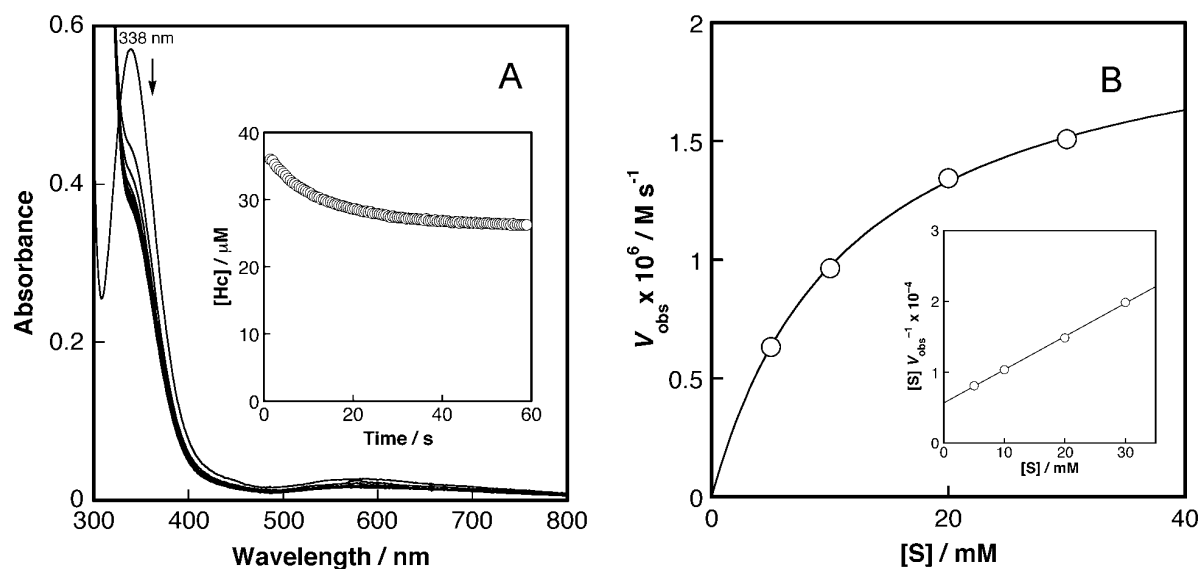

**Fig. S7** (A) Spectral change of the fast phase observed upon addition of *p*-methoxyphenol (10 mM) to the oxy-form of hexameric *Pt*-6Hc (39 μM) in 0.5 M borate buffer (pH 9.0) containing 10 % (v/v) methanol and 3 M urea at 25 °C under N<sub>2</sub>: 10 s interval (Time course of the absorption change at 338 nm). (B) Plot of  $k_{\text{obs}}$  vs. [Substrate] (Inset: Hanes-Woolf plot).

Fig. S8

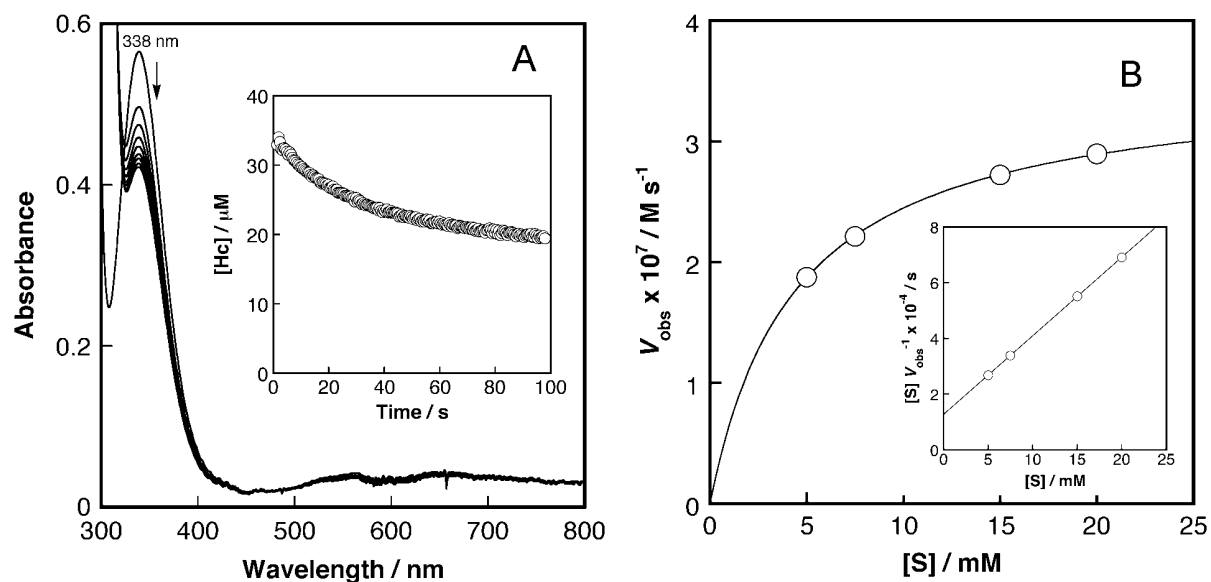

**Fig. S8** (A) Spectral change of the fast phase observed upon addition of *p*-fluorophenol (10 mM) to the oxy-form of hexameric *Pt*-6Hc (39  $\mu\text{M}$ ) in 0.5 M borate buffer (pH 9.0) containing 10 % (v/v) methanol and 3 M urea at 25  $^{\circ}\text{C}$  under  $\text{N}_2$ : 10 s interval (Time course of the absorption change at 338 nm). (B) Plot of  $k_{\text{obs}}$  vs. [Substrate] (Inset: Hanes-Woolf plot).

Fig. S9

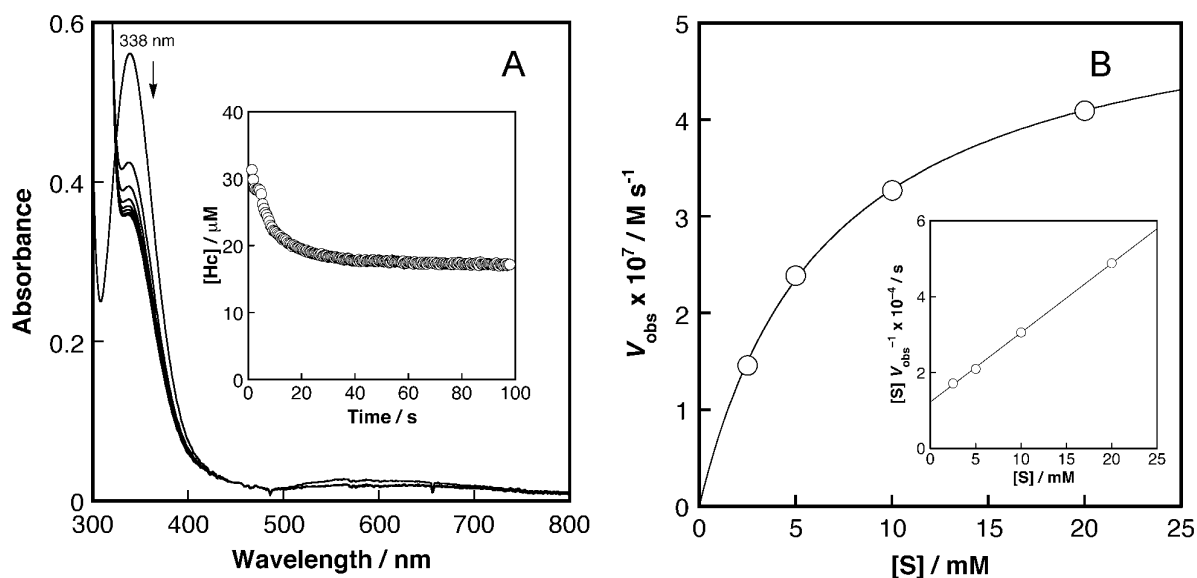

**Fig. S9** (A) Spectral change of the fast phase observed upon addition of *p*-chlorophenol (10 mM) to the oxy-form of hexameric *Pt*-6Hc (39  $\mu\text{M}$ ) in 0.5 M borate buffer (pH 9.0) containing 10 % (v/v) methanol and 3 M urea at 25  $^{\circ}\text{C}$  under  $\text{N}_2$ : 10 s interval (Time course of the absorption change at 338 nm). (B) Plot of  $k_{\text{obs}}$  vs. [Substrate] (Inset: Hanes-Woolf plot).

Fig. S10

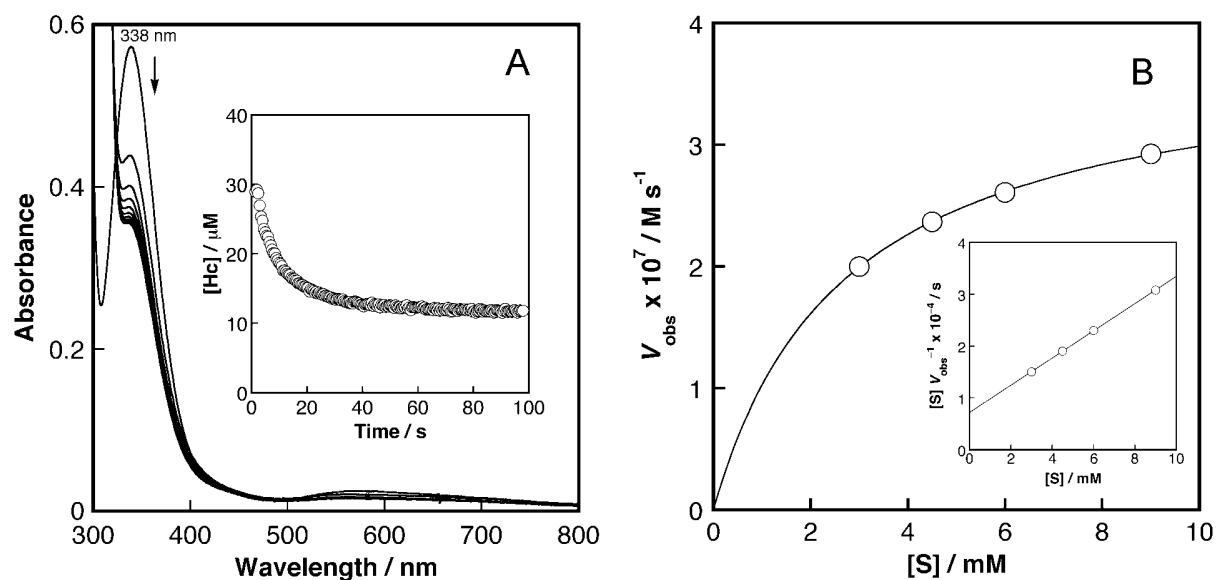

**Fig. S10** (A) Spectral change of the fast phase observed upon addition of *p*-bromophenol (6 mM) to the oxy-form of hexameric *Pt*-6Hc (39 μM) in 0.5 M borate buffer (pH 9.0) containing 10 % (v/v) methanol and 3 M urea at 25 °C under N<sub>2</sub>: 10 s interval (Time course of the absorption change at 338 nm). (B) Plot of  $k_{\text{obs}}$  vs. [Substrate] (Inset: Hanes-Woolf plot).

Fig. S11

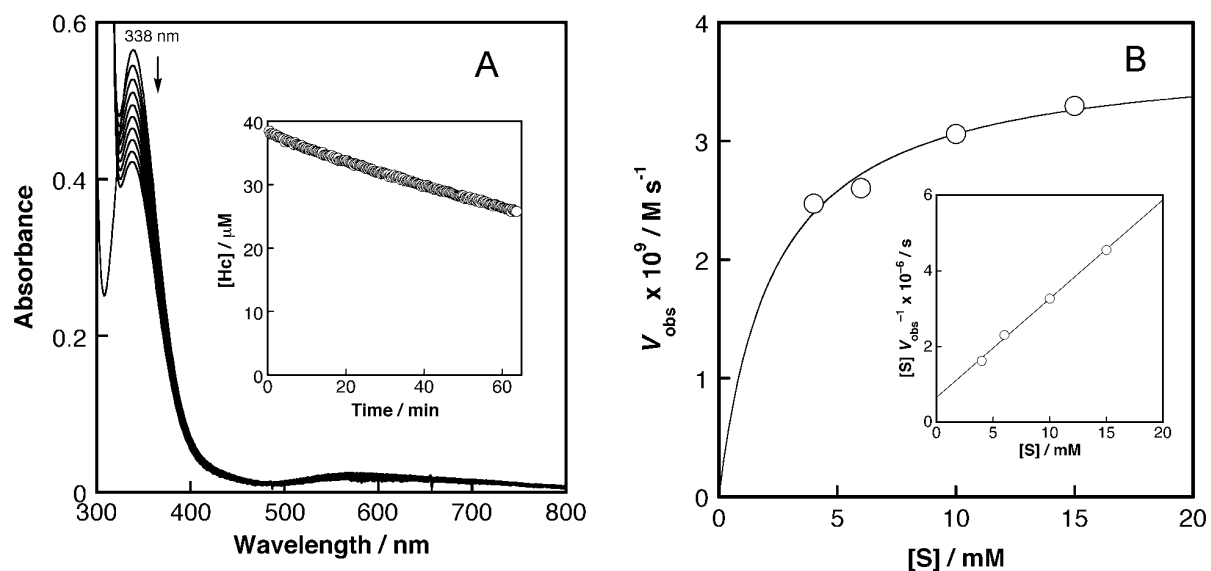

**Fig. S11** (A) Spectral change of the fast phase observed upon addition of *p*-cyanophenol (10 mM) to the oxy-form of hexameric *Pt*-6Hc (39 μM) in 0.5 M borate buffer (pH 9.0) containing 10 % (v/v) methanol and 3 M urea at 25 °C under N<sub>2</sub>: 400 s interval (Time course of the absorption change at 338 nm). (B) Plot of  $k_{\text{obs}}$  vs. [Substrate] (Inset: Hanes-Woolf plot).

## Scheme S1

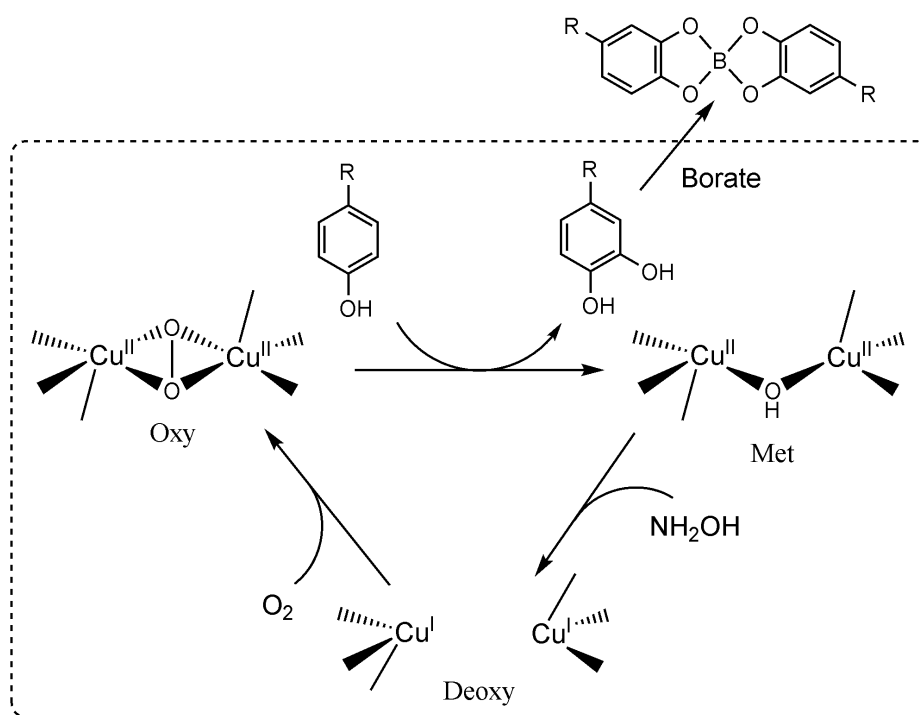

Supplement: c000760a.pdf [file c000760a.pdf]
